# Supplementary material
Source: Springer Nature journal article supplement (https://www.springermedizin.de/resource/supplementary/12890_2013_518_MOESM3_ESM.pdf/9505666)

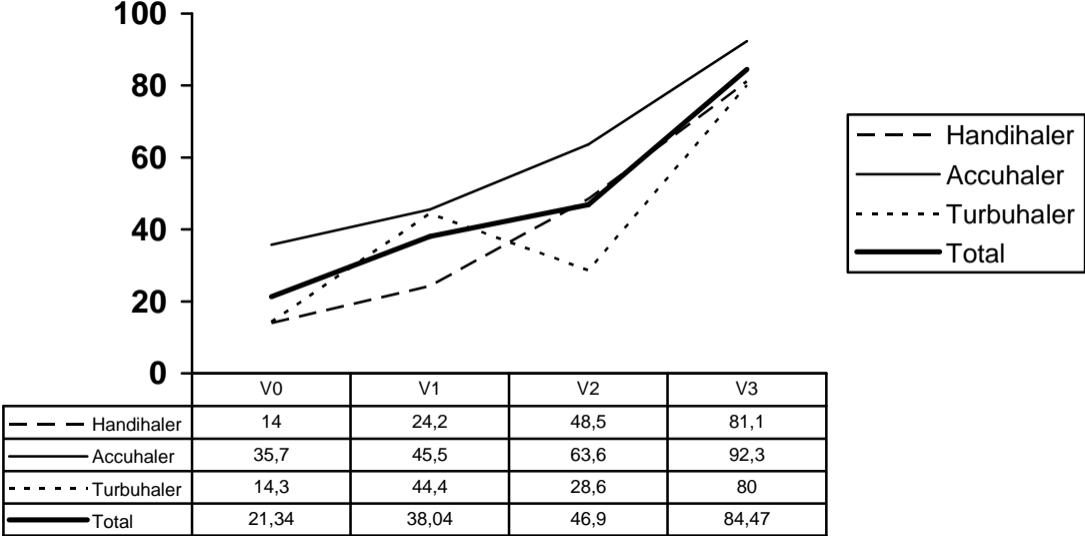

Supplement: MOESM3 [file 9505666]
